# Supplementary material for: Influence of Intratumor Microbiome on Clinical Outcome and Immune Processes in Prostate Cancer
Source: MDPI journal article supplement (doi:10.3390/cancers12092524), 2020-09-05
Supplement: s1 [file s1]

# Supplementary Materials: Influence of Intratumor Microbiome on Clinical Outcome and Immune Processes in Prostate Cancer

Jiayan Ma, Aditi Gnanasekar, Abby Lee, Wei Tse Li, Martin Haas, Jessica Wang-Rodriguez, Eric Y. Chang, Mahadevan Rajasekaran and Weg M. Ongkeko

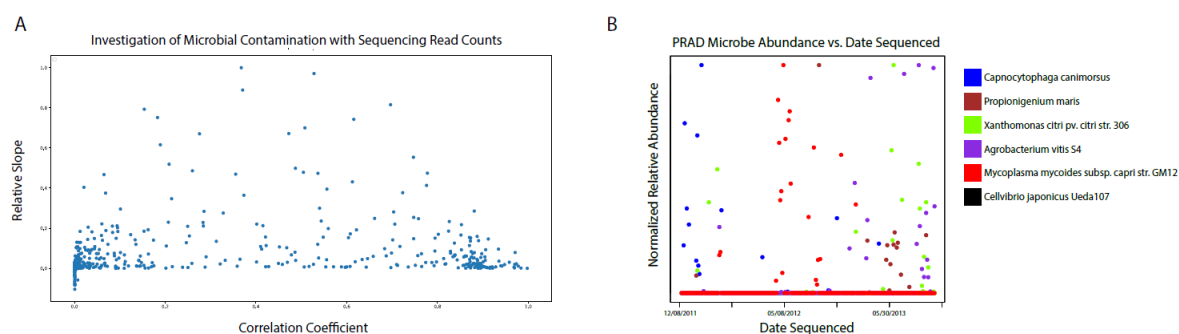

**Figure S1.** (A) Microbial contamination correction with sequencing read counts. R-squared and slope was calculated to detect contaminants, microbes with large slopes. (B) Contamination correction by date sequenced.

**Table S1.** Microbes in PC. Columns "Role in PC" and "Correlation" are written according to results found in this study. Column "Known Function" is written according to prior research.

| Microbe                                        | Role in PC | Known Function                                                  | Correlation   |
|------------------------------------------------|------------|-----------------------------------------------------------------|---------------|
| <i>Pediococcus pentosaceus</i>                 | Anti-tumor | Mitigate colon cancer                                           | Gleason score |
| <i>Listeria monocytogenes</i> (Lm)             | Anti-tumor | Stimulate proinflammatory cytokines and trigger immune response | Gleason score |
| <i>Lactobacillus crispatus</i>                 | Anti-tumor | Causes reduction in tumor size in breast cancer                 | Gleason score |
| <i>Bacillus halodurans</i>                     | Anti-tumor |                                                                 | Gleason score |
| <i>Nevskia ramosa</i>                          | Pro-tumor  |                                                                 | Gleason score |
| <i>Methylobacterium radiotolerans</i> JCM 2831 | Anti-tumor |                                                                 | TNM staging   |
| <i>Meiothermus silvanus</i> DSM 9946           | Anti-tumor |                                                                 | TNM staging   |
| <i>Rhodococcus erythropolis</i> PR4            | Anti-tumor | Associated with immunosuppression                               | TNM staging   |
| <i>Methylobacterium radiotolerans</i>          | Anti-tumor | Associated with immunosuppression                               | TNM staging   |
| <i>Stenotrophomonas maltophilia</i>            | Anti-tumor | Associated with infection                                       | TNM staging   |
| <i>Thermus thermophilus</i>                    | Pro-tumor  | Anti-tumor according to past research; inhibits cancer growth   | PSA           |
| <i>Campylobacter concisus</i>                  | Pro-tumor  | Induces inflammation                                            | PSA           |
| <i>Streptococcus pneumoniae</i>                | Pro-tumor  |                                                                 | PSA           |
| <i>Xanthomonas albilineans</i> GPE PC73        | Anti-tumor |                                                                 | PSA           |
| <i>Herminiimonas arsenicoxydans</i>            | Anti-tumor |                                                                 | PSA           |

|                                                  |            |                                                                                                                             |                                                                  |
|--------------------------------------------------|------------|-----------------------------------------------------------------------------------------------------------------------------|------------------------------------------------------------------|
| <i>Pseudarthrobacter chlorophenolicus</i>        | Anti-tumor |                                                                                                                             | PSA                                                              |
| <i>D. acidovorans</i> SPH-1                      | Pro-tumor  | Associated with immunosuppression and infection                                                                             | Genomic alterations and dysregulated IA genes                    |
| <i>N. hamburgensis</i> X 14                      | Pro-tumor  |                                                                                                                             | Genomic alterations and dysregulated IA genes                    |
| <i>S. aureus</i>                                 | Pro-tumor  | Causes prostate abscess/inflammation                                                                                        | Genomic alterations, dysregulated IA genes, PCSC gene expression |
| <i>G. vaginalis</i>                              | Pro-tumor  | Strongly associated with infection                                                                                          | Genomic alterations and dysregulated IA genes                    |
| <i>Bradyrhizobium elkanii</i>                    | Anti-tumor |                                                                                                                             | AR expression                                                    |
| <i>Ochrobactrum anthropi</i> ATCC 49188          | Anti-tumor |                                                                                                                             | AR expression                                                    |
| <i>Bradyrhizobium japonicum</i>                  | Anti-tumor |                                                                                                                             | AR expression                                                    |
| <i>Escherichia coli</i> ETEC H10407              | Pro-tumor  |                                                                                                                             | AR expression                                                    |
| <i>Escherichia coli</i> str. K-12 substr. MG1655 | Pro-tumor  |                                                                                                                             | AR expression                                                    |
| <i>Paraburkholderia phymatum</i> STM815          | Pro-tumor  |                                                                                                                             | PCSC gene expression                                             |
| <i>Pseudomonas putida</i> F1                     | Pro-tumor  |                                                                                                                             | PCSC gene expression                                             |
| <i>Haemophilus parainfluenzae</i> T3T1           | Pro-tumor  |                                                                                                                             | PCSC gene expression                                             |
| <i>Stackebrandtia nassauensis</i> DSM 44728      | Pro-tumor  | Breaks down uric acid                                                                                                       |                                                                  |
| <i>Mycoplasma hyorhinis</i> HUB-1                | Pro-tumor  | Activates the NLRP3 Inflammasome and MMP2, phosphorylation of EGFR, promotes migration and invasion of gastric cancer cells |                                                                  |

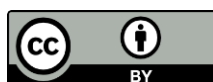

© 2020 by the authors. Licensee MDPI, Basel, Switzerland. This article is an open access article distributed under the terms and conditions of the Creative Commons Attribution (CC BY) license (<http://creativecommons.org/licenses/by/4.0/>).
